# Supplementary material for: Society for Immunotherapy of Cancer (SITC) checkpoint inhibitor resistance definitions: efforts to harmonize terminology and accelerate immuno-oncology drug development
Source: HighWire-hosted journal article supplement (doi:10.1136/jitc-2023-007309), 2023-07-01
Supplement: jitc-2023-007309supp001_data_supplement.pdf [file jitc-2023-007309supp001_data_supplement.pdf]

**Supplementary Figure 1: SITC ICI Monotherapy Resistance Definitions**

Abbreviations: CR, complete response; PD, progressive disease; PR, partial response; SD, stable disease

**Definitions of Primary and Secondary Resistance for ICI Monotherapy<sup>2</sup>**

| Resistance Phenotype        | Drug Exposure Requirement | Best response              | Confirmatory Scan for PD Requirement | Confirmatory Scan Time Frame                          |
|-----------------------------|---------------------------|----------------------------|--------------------------------------|-------------------------------------------------------|
| <b>Primary Resistance</b>   | ≥ 6 Weeks                 | PD; SD for < 6 months*     | Yes**                                | At least 4 weeks after initial disease progression*** |
| <b>Secondary Resistance</b> | ≥ 6 Months                | CR, PR, SD for > 6 months* | Yes**                                | At least 4 weeks after disease progression***         |

\*Indolent tumor types might require modification of the timeframe

\*\*Other than when tumor growth is very rapid and patients are deteriorating clinically

\*\*\*Per RECIST1.1

**Definitions of Adjuvant Therapy Resistance for ICI Monotherapy<sup>2</sup>**

| Adjuvant Therapy                             | Timing of Last Dose Prior to PD | Confirmatory Biopsy Requirement* |
|----------------------------------------------|---------------------------------|----------------------------------|
| <b>Primary Resistance/<br/>Early Relapse</b> | < 12 weeks                      | Yes                              |
| <b>Late Relapse</b>                          | ≥ 12 Weeks                      | Yes                              |

\*In this setting, a confirmatory biopsy would supplant a confirmatory scan

**Definitions of Neoadjuvant Therapy Resistance for ICI Monotherapy<sup>2</sup>**

| Major Pathological Response                  | Yes                                     | No                                    |
|----------------------------------------------|-----------------------------------------|---------------------------------------|
| <b>Resistance Definition Recommendations</b> | Follow Secondary Resistance Definitions | Follow Primary Resistance Definitions |

**Definitions of Resistance after Discontinuing Treatment with ICI Monotherapy<sup>2</sup>**

| <b>Stopped Therapy (CR/PR/end of study/other social rationale)</b> | <b>Duration of time after last dose of PD-(L)1 Inhibitor</b> | <b>Confirmatory Scan Requirement</b> |
|--------------------------------------------------------------------|--------------------------------------------------------------|--------------------------------------|
| <b>Primary Resistance</b>                                          | No CR/PR prior to discontinuation                            | No                                   |
| <b>Secondary Resistance</b>                                        | Prior CR/PR and $\leq 12$ Weeks from last dose               | Yes                                  |
| <b>Late Progression</b>                                            | Prior CR/PR and $>12$ weeks from last dose                   | Yes                                  |
