# Supplementary material for: Society for Immunotherapy of Cancer (SITC) checkpoint inhibitor resistance definitions: efforts to harmonize terminology and accelerate immuno-oncology drug development
Source: HighWire-hosted journal article supplement (doi:10.1136/jitc-2023-007309), 2023-07-01
Supplement: jitc-2023-007309supp002_data_supplement.pdf [file jitc-2023-007309supp002_data_supplement.pdf]

**Supplementary Figure 2: SITC ICI Combination Resistance Definitions**

Abbreviations: CR, complete response; PD, progressive disease; PR, partial response; SD, stable disease

**Definitions of Primary Resistance for ICI Combinations**

| Treatment combination         | Exposure requirement                                   | Best response          | Confirmatory scan requirement                     |
|-------------------------------|--------------------------------------------------------|------------------------|---------------------------------------------------|
| IO-Chemotherapy <sup>3*</sup> | 6–8 weeks**                                            | PD ≤ 6 months***       | Not required                                      |
| IO-Targeted <sup>4</sup>      | 8–12 weeks****<br>(at least 2 cycles of ICI component) | PD or<br>SD < 6 months | Not required                                      |
| IO-IO <sup>5</sup>            | 12 weeks and/or a minimum of 2 cycles of both drugs    | PD or SD < 6 months    | At least 4 weeks after PD, if clinically feasible |

\*For patients that experience recurrent disease after stopping therapy for reasons other than toxicity, no uniform clinical definitions of resistance applicable across disease states could be described

\*\*For rapidly progressing disease, any exposure is adequate

\*\*\*Timing of RECIST progression regardless of best response

\*\*\*\*In the absence of toxicity or progression while on treatment

**Secondary Resistance for ICI Combinations**

| Treatment combination         | Exposure requirement | Best response                  | Confirmatory scan requirement                     |
|-------------------------------|----------------------|--------------------------------|---------------------------------------------------|
| IO-Chemotherapy <sup>3*</sup> | > 6 months           | PD > 6 months**                | Not required                                      |
| IO-Targeted <sup>4</sup>      | > 6 months           | CR, PR, or<br>SD ≥ 6 months    | Not required                                      |
| IO-IO <sup>5</sup>            | > 6 months           | CR, PR, or<br>SD ≥ 6 months*** | At least 4 weeks after PD, if clinically feasible |

\*For patients that experience recurrent disease after stopping therapy for reasons other than toxicity, no uniform clinical definitions of resistance applicable across disease states could be described

\*\*Timing of RECIST progression regardless of best response

\*\*\*For aggressive tumors such as mesothelioma and NSCLC, 3 months is required

**Resistance for ICI Combinations in the Adjuvant Setting**

| Treatment combination         | Exposure requirement                                | Best response                                                          |
|-------------------------------|-----------------------------------------------------|------------------------------------------------------------------------|
| IO-Chemotherapy <sup>3*</sup> | Undefined                                           | Undefined                                                              |
| IO-Targeted <sup>4</sup>      | A minimum of 6 weeks to adjuvant therapy completion | Recurrence < 12 weeks after the last administered dose                 |
| IO-IO <sup>5</sup>            | Completion of regimen                               | ≤ 12 weeks or recurrence on therapy after the last administered dose** |

\*Definitions could not be agreed upon given current data availability

\*\*Primary resistance is deemed undeterminable if progression occurs > 12 weeks after the last administered dose

#### **Resistance for ICI Combinations in the Neoadjuvant Setting**

| <b>Treatment combination</b>        | <b>Exposure requirement</b> | <b>Best response</b>                                                    |
|-------------------------------------|-----------------------------|-------------------------------------------------------------------------|
| <b>IO-Chemotherapy<sup>3*</sup></b> | Undefined                   | Undefined                                                               |
| <b>IO-Targeted<sup>4</sup></b>      | Minimum of 6 weeks          | < 50% tumor death in resection specimen                                 |
| <b>IO-IO<sup>5**</sup></b>          | Completion of regimen       | ≤ 12 weeks or recurrence on therapy after the last administered dose*** |

\*Definitions could not be agreed upon given current data availability

\*\*Definitions are only applied in scenarios where postoperative therapy is not applied and major pathologic response was achieved. Resistance cannot be determined if major pathologic response is absent

\*\*\*Primary resistance is deemed undeterminable if progression occurs > 12 weeks after the last administered dose
